# Supplementary material
Source: Research Square preprint supplement (doi:10.21203/rs.3.rs-8734342/v1)
Supplement: Supplementary file 1 [file 6e58e8fdbed075056e52ec0b.doc]

**A panel of *CYP6Z* genes drives broad-spectrum cross-resistance to public health insecticides in the major malaria vector *An. gambiae s.s.***

**Supplementary Table 1: List of primers used in this study**

| **Genes** | **Primer name** | **Sequences** | **Amplicon size (bp)** |
| --- | --- | --- | --- |
| **Polymorphism survey and transgenic expression** | | | |
| ***CYP6Z1*** | CYP6Z1_BgLII Forward | AGATCTATGATCCTTTACACGATCGGA | 1584 |
| CYP6Z1_Xbal Reverse | TCTAGATTAATGTTTAGCACGATTCTCGAT |
| ***CYP6Z2*** | CYP6Z2_BgLII Forward | AGATCTATGTTTGTTTACACTCTCGCGCT | 1713 |
| CYP6Z2_Xbal Reverse | TCTAGATCACTTTCTATGGTCTATCCTCAT |
| ***CYP6Z4*** | CYP6Z3_BgLII Forward | AGATCTATGTTTGTTTACACTCTCGCG | 1762 |
| CYP6Z3_Xbal Reverse | TCTAGATCAGCATCTATGTTCTACGC |  |
| ***CYP6Z4*** | CYP6Z4_EcoRI Forward | GAATTCATGTTCGTGTACACGCTAGCT | 1564 |
| CYP6Z4_Xbal Reverse | TCTAGATTATTGTACTTTAGCGCGATCA |
| **Expression profile** | | | |
| ***CYP6Z1*** | qCYP6Z1 Forward | AACTGTATCGGTCTGCGGCA | 160 |
| qCYP6Z1 Reverse | TCTCGATCCTCATTGGAAGG |
| ***CYP6Z2*** | qCYP6Z2 Forward | TTCGGAGCTGGTCCTCGCAA | 152 |
| qCYP6Z2 Reverse | CAGCGTCTGGAGTGAGACCT |
| ***CYP6Z3*** | qCYP6Z3 Forward | CCACGCAATTGCATTGGTCTTA |  |
| qCYP6Z3 Reverse | CATGGGGAAACCATCTTCTG | 156 |
| ***CYP6Z4*** | qCYP6Z4 Forward | AGGAACGCAGGTGATCATTC | 179 |
| qCYP6Z4 Reverse | GCATTATACCTTGTCGCAGTC |
| ***Elongation Factor*** | qEF Forward | GGCAAGAGGCATAACGATCAATGCG | 110 |
| qEF Reverse | GTCCATCTGCGACGCTCCGG |  |
| ***RSP7*** | qRSP7 Forward | CCACCATCGAACACAAAGTTGA | 117 |
| qRSP7 Reverse | TGCTGCAAACTTCGGCTATTC |
| **RNA silencing** | | | |
| ***CYP6Z1*** | dsCYP6Z1 Forward | taatacgactcactatagggagaGCTACGTGCTCGATGTGGT | 360 |
| dsCYP6Z1 Reverse | taatacgactcactatagggagaCCCACTGCTACCAGCCTTG |
| ***CYP6Z2*** | dsCYP6Z2 Forward | taatacgactcactatagggagaATACCGTTGTTGAGTATCAG | 375 |
| dsCYP6Z2 Reverse | taatacgactcactatagggagaCAATTTATCTCACTTTCTAT |
| ***CYP6Z4*** | dsCYP6Z3 Forward | taatacgactcactatagggagaATACCGTTGTTGAGTATCAGT | 320 |
| dsCYP6Z3 Reverse | taatacgactcactatagggaga ACTGCATAATACAAGTTATC |  |
| ***CYP6Z4*** | dsCYP6Z4 Forward | taatacgactcactatagggagaAATTTTAAACCGTGTCTGCAC | 335 |
| dsCYP6Z4 Reverse | taatacgactcactatagggagaTTATTGTACTTTAGCGCGATC |

**Supplementary Table 2:** *CYP6Z* genes are differentially expressed in *Anopheles gambiae s.s.* across different resistance groups

| **Gene ID** | **Gene** | **Chr.** | **Fold Change** | | | | | **Read counts** | | | | |
| --- | --- | --- | --- | --- | --- | --- | --- | --- | --- | --- | --- | --- |
| **RS** | **RC** | **CS** | **10x-1x** | **5x-1x** | **S** | **C** | **1x** | **5x** | **10x** |
| AGAP008219 | *CYP6Z1* | 3R | 6.0 | - | 12.3 | 2.1 | 2.0 | 1501 | 18464 | 9056 | 18122 | 19358 |
| AGAP008218 | *CYP6Z2* | 3R | 17.2 | - | 29.0 | - | - | 470 | 13640 | 8098 | 10702 | 12434 |
| AGAP008217 | *CYP6Z3* | 3R | 41.4 | - | 63.8 | - | - | 86 | 5501 | 3572 | 3000 | 4549 |
| AGAP008217 | *CYP6Z4* | 3R | - | - | - | - | - | 40 | 73 | 71 | 70 | 86 |


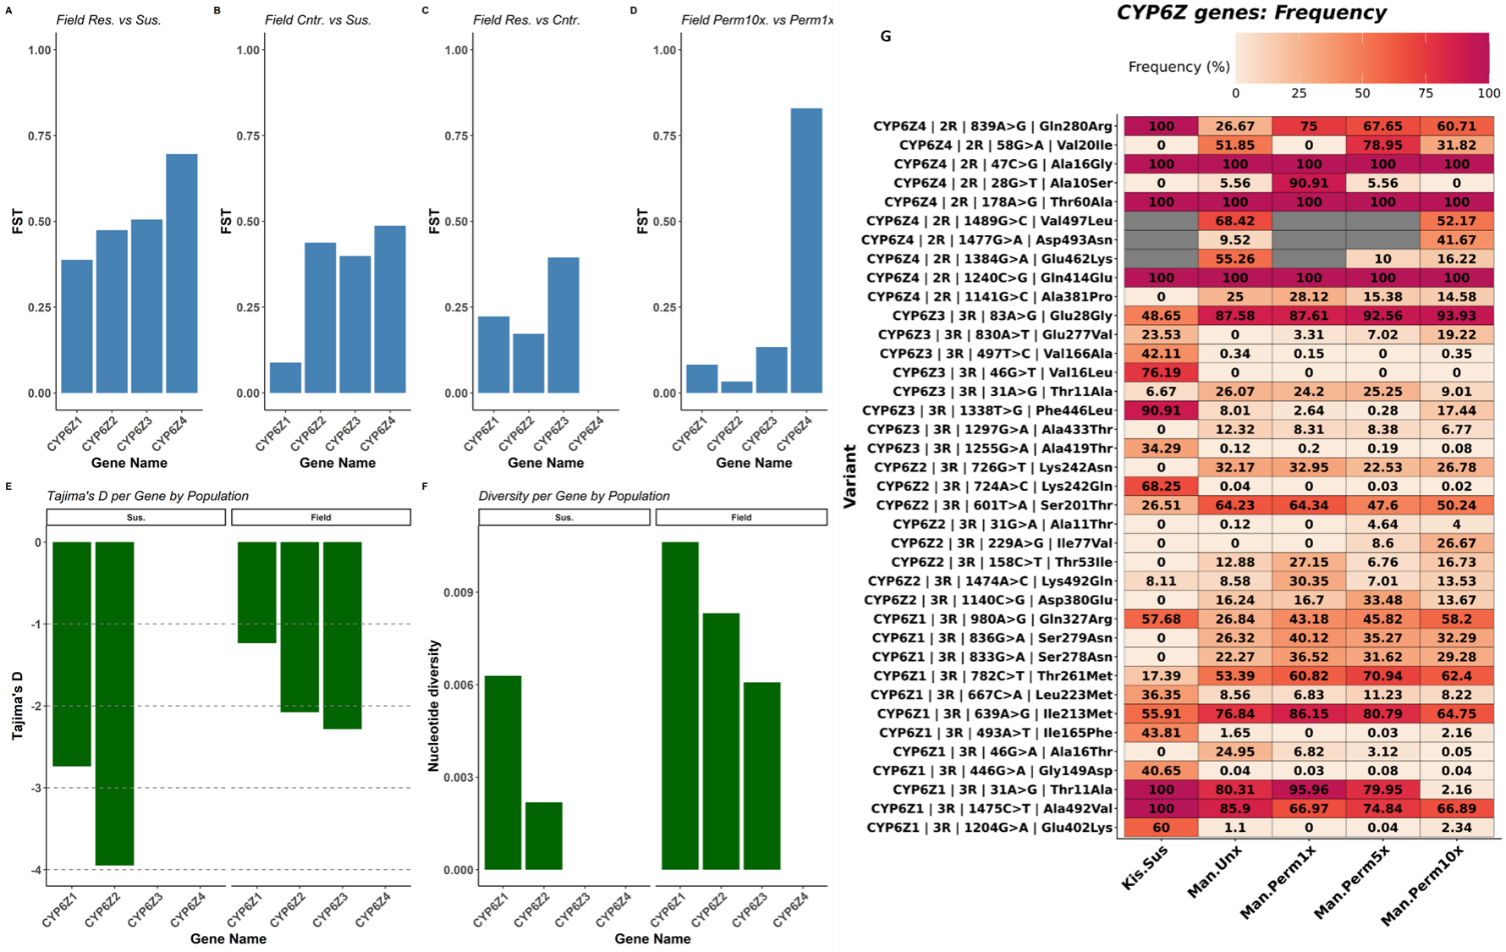


**Supplementary Figure 1: Genetic differentiation, diversity metrics, and SNP associations in *CYP6Z* gene family and related resistance genes in *An. gambiae*:** A–D show gene-specific FST values across population contrasts: (A) Field resistant vs susceptible (Man_R–S), (B) Field control vs susceptible (Man_C–S), (C) Field resistant vs field control (Man_R–C), and (D) Field permethrin dose comparison (Man_10× vs 1×). (E) Tajima’s D per gene across susceptible and field populations. (F) Nucleotide diversity (π) per gene across susceptible and field populations. (G) Heatmap of nonsynonymous SNP allele frequencies and Fisher’s exact test p-values for candidate resistance genes, including *CYP6Z* subfamily members. Frequencies are color-coded from light orange (low) to dark red (high), and significant p-values are indicated (p < 0.05). Gene names, chromosomal positions, and amino acid substitutions are listed on the left


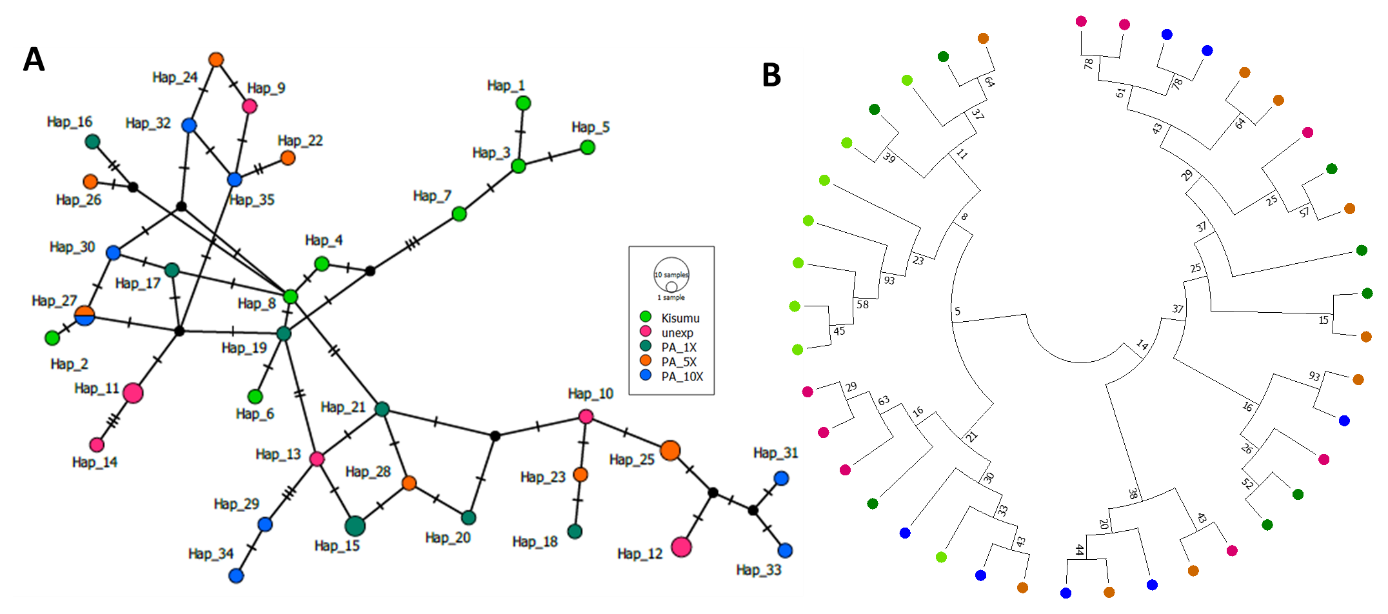


**Supplementary Figure 2: Genetic diversity of *CYP6Z1* in *Anopheles gambiae* populations exposed to increasing permethrin concentration:** (A) *CYP6Z1* haplotype Network, (B) *CYP6Z1* phylogenetic tree, theses data of *CYP6Z1* reveals Absence of directional Selection.


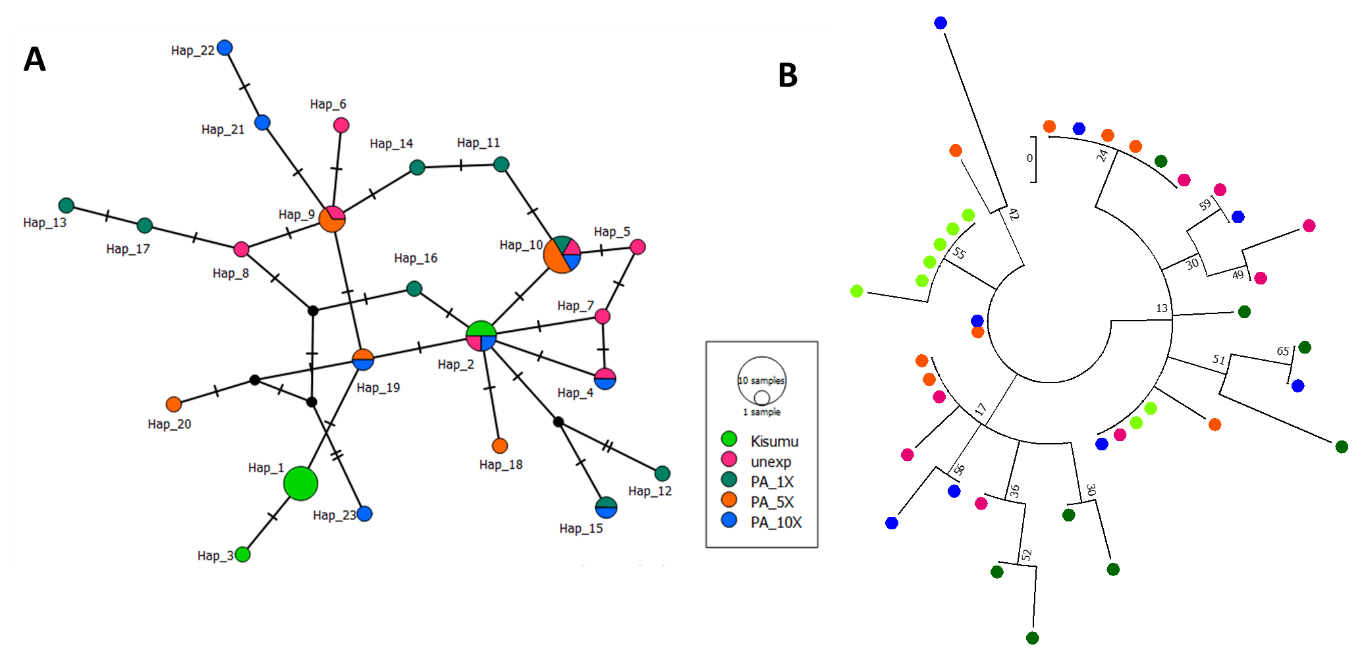


**Supplementary Figure 3: Genetic diversity of *CYP6Z2* in *Anopheles gambiae* populations exposed to increasing permethrin concentration:** (A) *CYP6Z2* haplotype Network, (B) *CYP6Z2* phylogenetic tree. The result indicates that there is evidence of selection at CYP6Z2 in anopheles gambiae across increasing permethrin exposure.


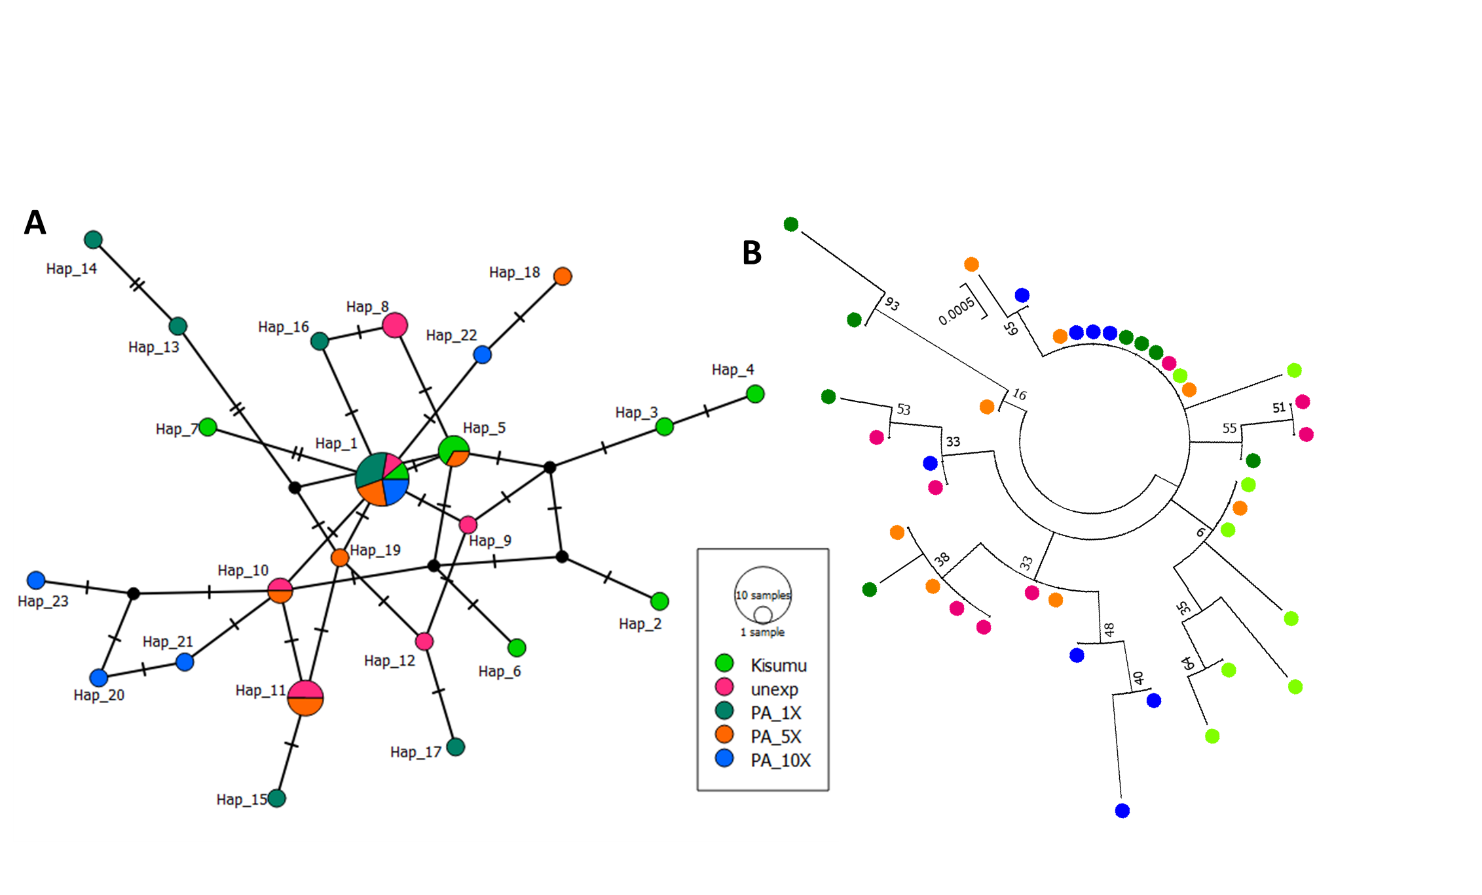


**Supplementary Figure 4:** **Haplotype network and phylogenetic tree of *CYP6Z3* in *An. gambiae* s.s. reveal high genetic diversity and lack of selection across increasing permethrin exposure levels:** (A) Haplotype network showing the distribution of *CYP6Z3* variants among Kisumu, unexposed, and permethrin-exposed populations (1X, 5X, and 10X), (B) Phylogenetic tree illustrating the absence of clustering by selection pressure, supporting no evidence of directional selection.


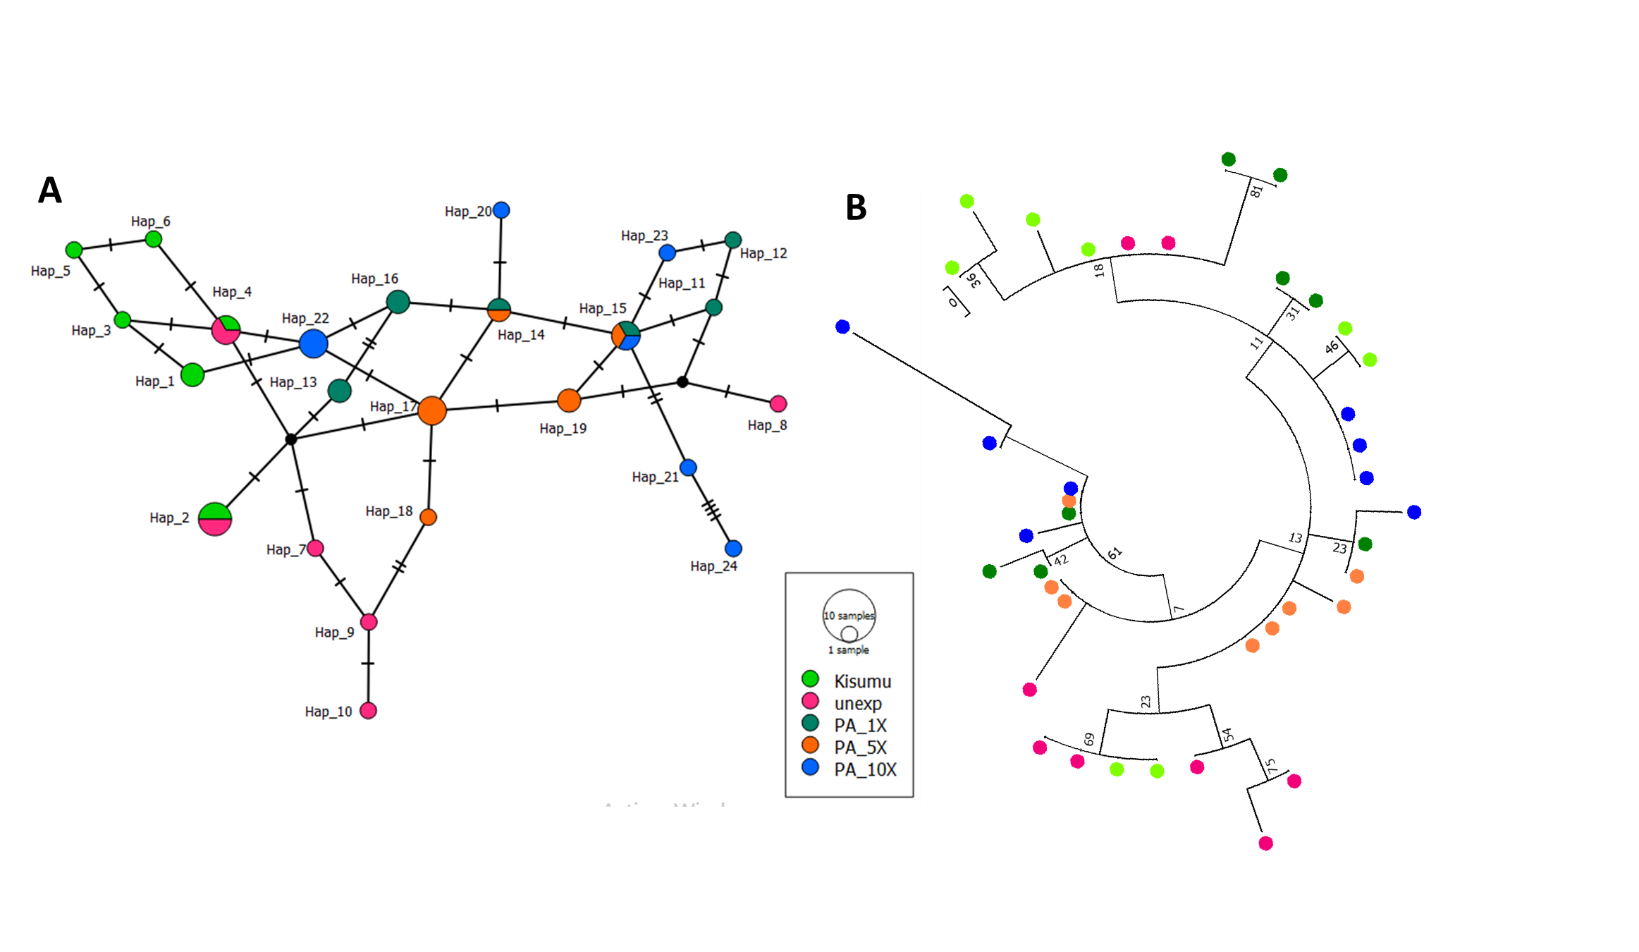


**Supplementary Figure 5: Haplotype network and phylogenetic tree of *CYP6Z4* in *An. gambiae s.s.* reveal high genetic diversity and lack of selection across increasing permethrin exposure levels:** (A) Haplotype network showing the distribution of *CYP6Z4* variants among Kisumu, unexposed, and permethrin-exposed populations (1X, 5X, and 10X), (B) Phylogenetic tree illustrating clustering by treatment group, reflecting genetic differentiation across exposure levels.


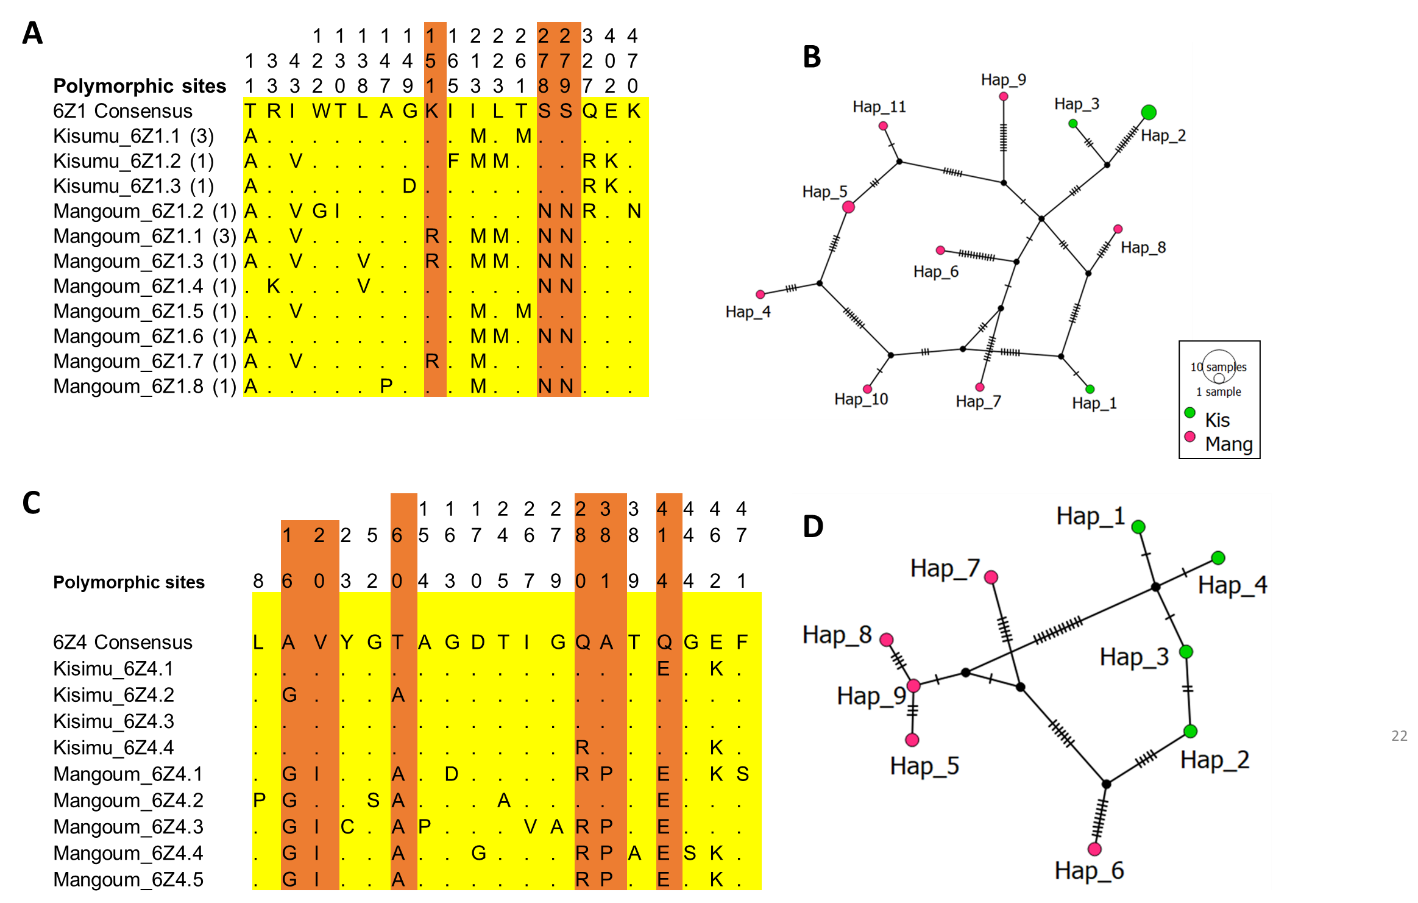


**Supplementary Figure 6:** **Polymorphism analysis of the *CYP6Z* gene family coding regions in*Anopheles coluzzii* and *An. gambiae s.s.*:** (A) Comparative analysis of *CYP6Z1* amino acid changes between *An. gambiae s.s.* from the Mangoum permethrin-resistant population and the Kisumu laboratory-susceptible strain; (B) *An. gambiae* *CYP6Z1* haplotype diversity network showing high diversity; (C) Comparative analysis of *CYP6Z4* amino acid changes between *An. gambiae* from Mangoum and the Kisumu strain. (D) *An. gambiae* s.s. *CYP6Z4* haplotype diversity network showing that the dominant haplotype (H1) is shared between Mangoum and Kisumu.


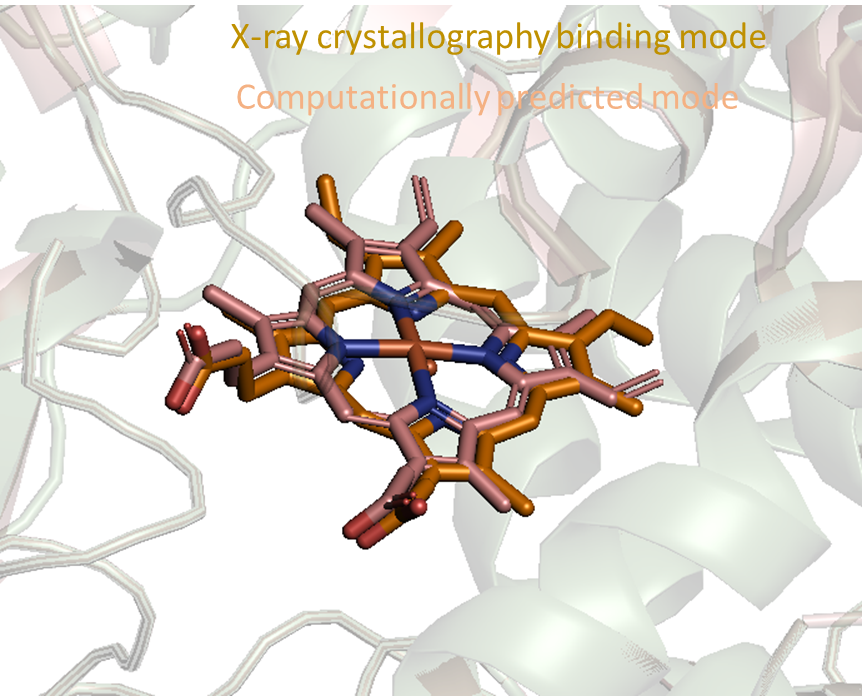


**Supplementary Figure 7:** Validation of docking protocol: haem molecule (brown) from the X-ray experimental structure was re-docked into its binding pocket. The software was most accurately able to predict a haem binding mode (coloured pink) very closely (RMSD=0.001Å) to the crystal one.

**Supplementary Table 3: Comparative Modelling and Molecular Docking Simulation of CYP6Zs with Insecticides**

| **Protein** | **Ligand** | **Best pose orientation** | | | | **Distance** |  |  | **Energy** |  |  |  |
| --- | --- | --- | --- | --- | --- | --- | --- | --- | --- | --- | --- | --- |
| **Susceptible** | | **Resistant** | | **Susceptible** | **Resistant** | **p-value** | **Susceptible** | | **Resistant** | **p-value** |
| **Rank** | **Atom** | **Rank** | **Atom** | **Mean** | **Mean** | **Mean** | **N** | **Mean** |
| ***CYP6Z1*** | Permethrin | 2 | C | 1 | C | 4.71 | 4.87 | 0.981 | -8.61 | 20 | -8.85 | 0.490 |
| α-cypermethrin | 2 | C | 1 | C | 5.05 | 4.75 | 0.969 | -9.36 | 26 | -9.35 | 0.959 |
| Deltamethrin | 1 | C | 1 | C | 4.67 | 4.82 | 0.981 | -8.51 | 25 | -8.71 | 0.663 |
| DDT | 2 | CL | 3 | CL | 5.01 | 5.09 | 0.981 | -6.95 | 12 | -7.31 | 0.663 |
| Propoxur | 17 | N | 14 | C | 5.25 | 5.08 | 0.981 | -5.57 | 8 | -5.67 | 0.678 |
| Bendiocarb | 18 | C | 11 | C | 4.94 | 5.28 | 0.981 | -6.14 | 8 | -6.20 | 0.959 |
| Malathion | 2 | C | 3 | C | 5.47 | 5.03 | 0.969 | -5.33 | 16 | -5.36 | 0.959 |
| Clothianidin | 2 | CL | 4 | CL | 4.87 | 5.05 | 0.981 | -5.81 | 14 | -5.83 | 0.959 |
| Imidacloprid | 1 | CL | 2 | CL | 4.95 | 4.98 | 0.981 | -6.50 | 18 | -6.94 | **0.003** |
| Acetamiprid | 1 | CL | 5 | N | 4.95 | 4.38 | 0.969 | -6.14 | 13 | -6.20 | 0.959 |
| Chlorfenapyr | 7 | CL | 1 | CL | 4.37 | 4.56 | 0.981 | -6.97 | 10 | -7.39 | 0.424 |
| Tralopyril | 1 | CL | 1 | CL | 4.46 | 4.68 | 0.981 | -7.65 | 12 | -7.75 | 0.959 |
| ***CYP6Z2*** | Permethrin | 1 | C | 13 | C | 4.64 | 5.15 | 0.861 | -8.38 | 25 | -8.57 | 0.445 |
| α-cypermethrin | 1 | C | 2 | C | 4.61 | 5.37 | 0.192 | -8.90 | 26 | -8.47 | **0.0004** |
| Deltamethrin | 2 | C | 1 | C | 4.94 | 5.43 | 0.861 | -8.88 | 26 | -8.35 | **0.0004** |
| DDT | 2 | CL | 2 | CL | 5.17 | 5.16 | 0.989 | -7.36 | 10 | -6.89 | 0.663 |
| Propoxur | 3 | C | 1 | C | 5.10 | 5.07 | 0.989 | -5.85 | 9 | -5.79 | 0.959 |
| Bendiocarb | 1 | C | 1 | C | 5.72 | 5.42 | 0.981 | -6.59 | 5 | -6.67 | 0.959 |
| Malathion | 2 | C | 5 | C | 5.82 | 4.45 | 0.184 | -5.19 | 8 | -5.05 | 0.663 |
| Clothianidin | 1 | CL | 1 | CL | 4.46 | 4.85 | 0.981 | -5.69 | 10 | -5.61 | 0.959 |
| Imidacloprid | 1 | CL | 1 | CL | 4.57 | 5.12 | 0.861 | -6.21 | 12 | -6.25 | 0.959 |
| Acetamiprid | 1 | CL | 2 | CL | 4.54 | 4.92 | 0.981 | -5.87 | 12 | -5.92 | 0.959 |
| Chlorfenapyr | 1 | CL | 2 | CL | 4.34 | 4.77 | 0.969 | -7.37 | 9 | -7.04 | 0.761 |
| Tralopyril | 2 | CL | 5 | CL | 4.38 | 4.51 | 0.981 | -7.45 | 11 | -7.24 | 0.811 |
| ***CYP6Z3*** | Permethrin | 1 | C | 1 | C | 4.86 | 4.55 | 0.981 | -8.54 | 29 | -8.73 | 0.208 |
| α-cypermethrin | 2 | C | 3 | C | 4.72 | 4.73 | 0.989 | -8.94 | 31 | -9.12 | 0.090 |
| Deltamethrin | 3 | C | 3 | C | 4.95 | 4.89 | 0.981 | -8.26 | 27 | -8.27 | 0.959 |
| DDT | 1 | CL | 4 | CL | 5.01 | 4.79 | 0.981 | -7.56 | 13 | -7.55 | 0.959 |
| Propoxur | 8 | H | 6 | C | 5.39 | 5.35 | 0.981 | -5.83 | 8 | -5.87 | 0.959 |
| Bendiocarb | 3 | C | 4 | N | 5.22 | 5.28 | 0.981 | -6.24 | 8 | -6.21 | 0.959 |
| Malathion | 1 | C | 2 | C | 5.31 | 4.19 | 0.192 | -4.89 | 10 | -4.99 | 0.663 |
| Clothianidin | 1 | CL | 2 | CL | 4.63 | 4.42 | 0.981 | -5.41 | 8 | -5.47 | 0.959 |
| Imidacloprid | 1 | CL | 1 | CL | 4.61 | 5.05 | 0.981 | -6.15 | 11 | -6.12 | 0.959 |
| Acetamiprid | 1 | CL | 1 | CL | 4.82 | 4.75 | 0.981 | -5.80 | 13 | -5.83 | 0.959 |
| Chlorfenapyr | 1 | CL | 1 | CL | 4.57 | 4.98 | 0.981 | -7.88 | 12 | -7.44 | 0.445 |
| Tralopyril | 2 | CL | 2 | CL | 4.59 | 4.45 | 0.981 | -7.60 | 11 | -7.62 | 0.959 |
| ***CYP6Z4*** | Permethrin | 2 | C | 3 | C | 5.00 | 5.12 | 0.981 | -8.23 | 20 | -8.10 | 0.890 |
| α-cypermethrin | 1 | C | 1 | C | 4.54 | 4.79 | 0.981 | -9.26 | 14 | -9.26 | 0.960 |
| Deltamethrin | 1 | C | 1 | C | 4.91 | 5.03 | 0.981 | -8.83 | 13 | -8.84 | 0.960 |
| DDT | 2 | CL | 1 | C | 4.20 | 5.80 | **0.002** | -8.04 | 9 | -7.54 | 0.663 |
| Propoxur | 12 | C | 5 | C | 4.91 | 5.16 | 0.981 | -5.99 | 11 | -5.98 | 0.959 |
| Bendiocarb | 5 | C | 5 | C | 4.95 | 4.81 | 0.981 | -6.36 | 9 | -6.63 | 0.663 |
| Malathion | 1 | C | 1 | C | 4.94 | 4.46 | 0.969 | -5.42 | 19 | -5.55 | 0.663 |
| Clothianidin | 1 | CL | 1 | CL | 4.53 | 4.29 | 0.981 | -5.95 | 13 | -5.90 | 0.959 |
| Imidacloprid | 1 | CL | 1 | CL | 4.88 | 4.63 | 0.981 | -6.59 | 11 | -6.92 | 0.678 |
| Acetamiprid | 1 | CL | 1 | CL | 4.69 | 4.62 | 0.981 | -6.25 | 14 | -6.43 | 0.761 |
| Chlorfenapyr | 2 | CL | 2 | CL | 4.11 | 4.19 | 0.981 | -7.32 | 7 | -7.59 | 0.890 |
| Tralopyril | 1 | F | 1 | F | 4.95 | 4.68 | 0.981 | -7.74 | 10 | -8.02 | 0.824 |


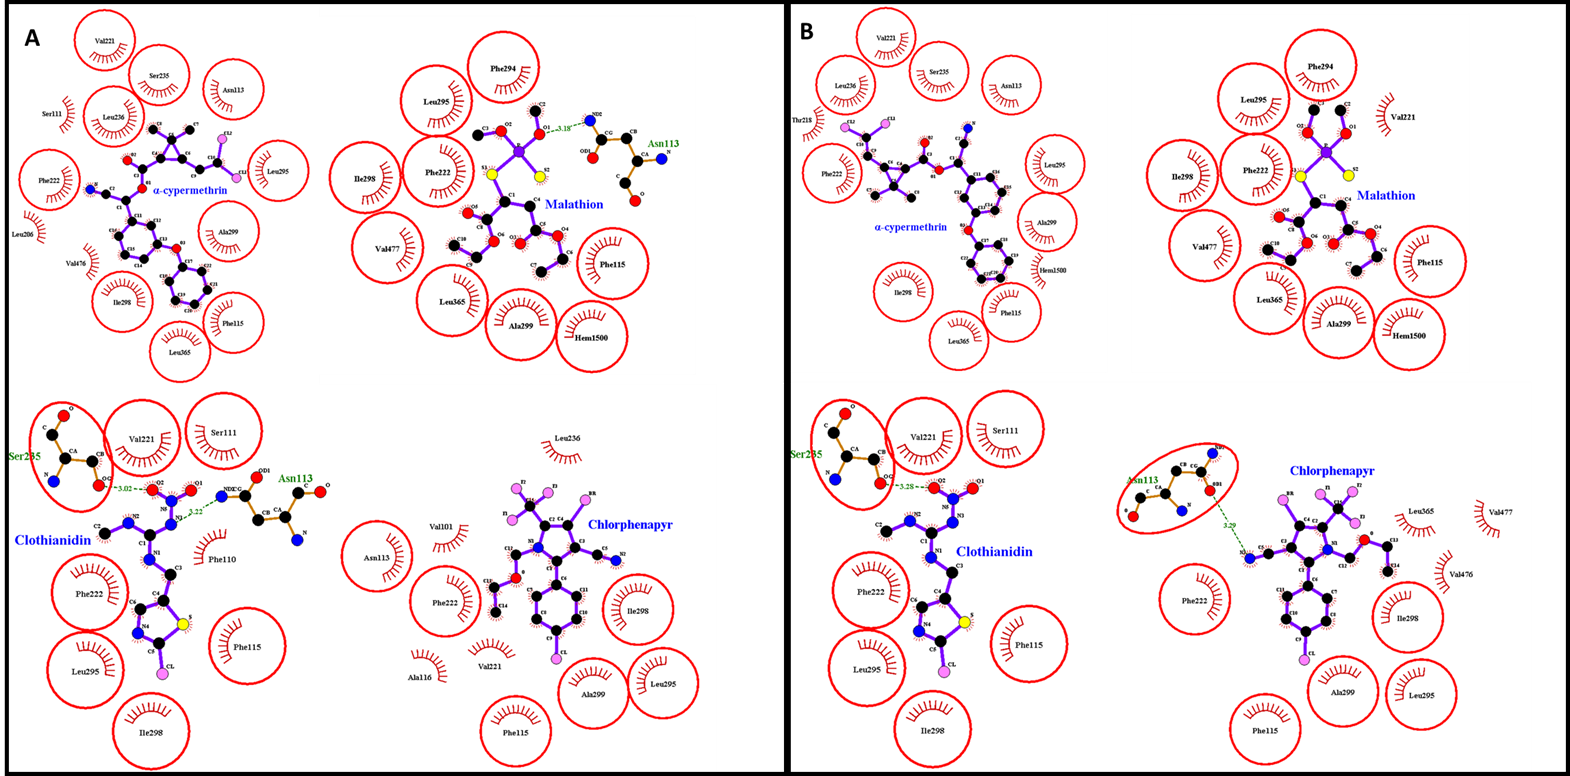


**Supplementary Figure 8:** **Comparative interaction profiles of *CYP6Z3* alleles with four insecticides visualized using LigPlot++.** Panels show predicted ligand–protein interactions for the Mangoum allele (A) and Kisumu allele (B) of *CYP6Z3* with four insecticides: α-cypermethrin, malathion, clothianidin, and chlorfenapyr. Each subpanel illustrates hydrogen bonds (green dashed lines) and hydrophobic contacts (red semicircles) between the insecticide molecule (center) and amino acid residues of the *CYP6Z3* active site.


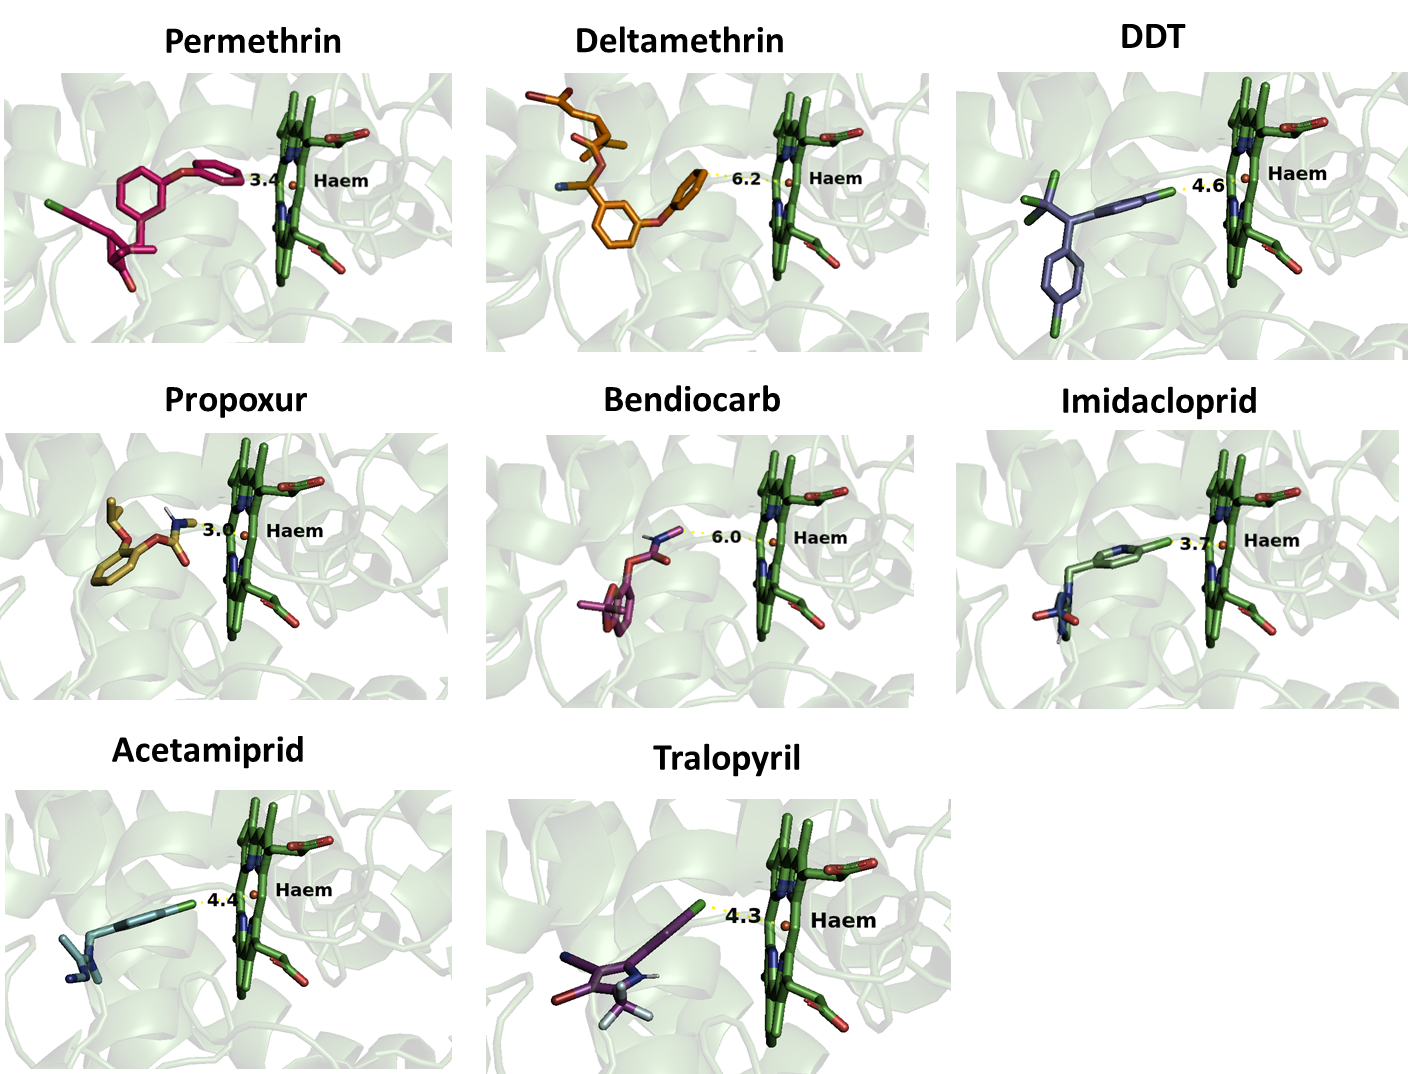


**Supplementary Figure 9: Binding mode of different insecticides classes into the *An. gambiae s.s.* *CYP6Z3* binding pocket.** Haem atoms are in stick format and colored by atom. Distance between possible sites of metabolism and haem iron is annotated in Angstrom.

**Supplementary Figure 10: Binding mode of different insecticides classes into the *An. gambiae s.s.* *CYP6Z1* binding pocket.** Haem atoms are in stick format and colored by atom. Distance between possible sites of metabolism and haem iron is annotated in Angstrom. Permethrin (red); alpha-cypermethrin (blue); deltamethrin (yellow); bendiocarb (magenta); DDT (cyan); malathion (orange); propoxur (tints); chlorphenapyr (limon); and imidacloprid (chocolate).

**Supplementary Figure 11: Confirmation of *CYP6Z* gene silencing in mosquitoes after 4 days post-injection and no-injected mosquitoes**. (p value: * p < 0.05. ** p < 0.01. *** and p < 0.001).


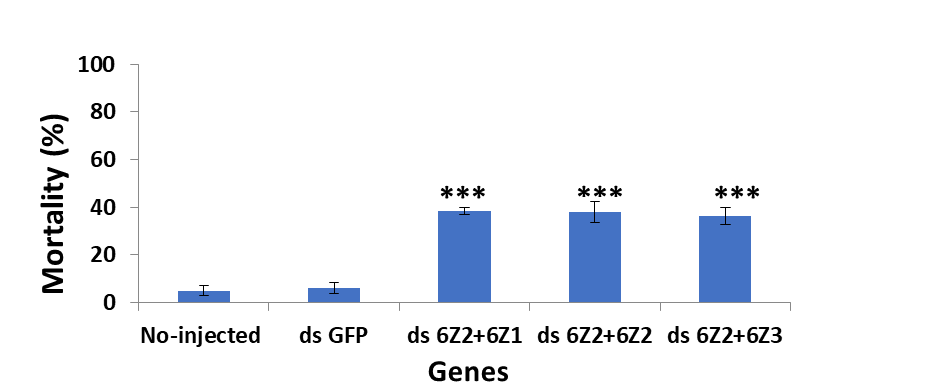


**Supplementary Figure 12: CYP6Z gene family knockdown increases susceptibility to deltamethrin 1X**. (* = p < 0.05, ** = p < 0.01, and *** = p < 0.001).

**Supplementary figure 13:** Confirmation of *An. gambiae* CYP6Z expression in transgenic flies expressing *CYP6Z1* and *CYP6Z4* trough quantitative quantitative PCR.

**Supplementary Figure 14: Cumulative mortalities of *CYP6Z* transgenic flies and control flies to insecticides after 24h exposure to insecticide:** (A) Pyrethroids; (B) Carbamates; (C) Organophosphates; (D) Chlorfenapyr. (p value: * p < 0.05. ** p < 0.01. *** and p < 0.001).

**Supplementary Figure 15: Impact of transgenic expression of *An. gambiae s.s.* *CYP6Z* gene family on cross-insecticide resistance.** Bioassay results showing mortality of transgenic flies expressing CYP6Z genes after exposure to fenitrothion. (p value: * p < 0.05. ** p < 0.01. *** and p < 0.001).
